# Supplementary material for: Relationship between Plasma Triglyceride Level and Severity of Hypertriglyceridemic Pancreatitis
Source: PubMed Central journal article supplement (PMC5058492; doi:10.1371/journal.pone.0163984), 2016-10-11
Supplement: pone.0163984.s001.pdf [file pone.0163984.s001.pdf]

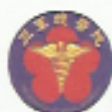

本審議會核准編號：1-105-05-041

計畫名稱：探討血液中三酸甘油酯值與高三酸甘油酯引發的胰臟炎之關係

執行機構：三軍總醫院

計畫主持人：內科部王勝輝醫師

計畫書版本日期：V 2.0\_20160329

個案報告表版本日期：V1.0\_20160320

本會審核通過之其他文件版本及日期：中文摘要 V2.0\_20160329

業經本院 2016 年 4 月 17 日人體試驗審議會第一審議會審查通過，該計畫案經評估屬低度風險，(持續審查頻率為每年一次)，有效期限至 2017 年 4 月 16 日，特此證明。本審議會的運作，遵循藥品優良臨床試驗準則及政府相關法律規章。計畫主持人應於同意函有效期屆滿前二個月，提出展延申請，本案須經本院人體試驗審議會通過後，方可繼續執行。

Letter of Approval  
Institutional Review Board, Tri-Service General Hospital

TSGHIRB No.: 1-105-05-041

Protocol title: The relation between plasma triglyceride level and hypertriglyceridemia-induced acute pancreatitis.

Research institution: Tri-Service General Hospital

Principle investigator: Dr. Sheng-Huei Wang

Protocol version: V 2.0\_20160329

Case Report Form: V1.0\_20160320

Other documents: Chinese Abstract V1.0\_20160320

on 04/17/2016, the Institutional Review Board I of the Tri-Service General Hospital approved the above-named application. The board is organized and operated in compliance with International Conference on Harmonization (ICH) / WHO Good Clinical Practice (GCP) and applicable laws and regulations.

This approval is valid for 1 year till 04/16/2017. The principle investigator is required to submit the application for extension 2 months before the expiration date.

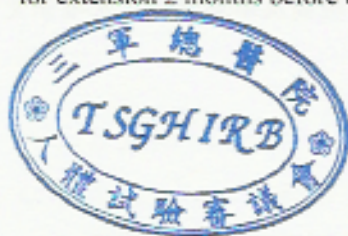

Institutional Review Board

余慕賢 *Yu Ma Hsien*

Chairman \_\_\_\_\_
